# Supplementary material
Source: publisher figshare collection journal article supplement (https://diabetesjournals.figshare.com/ndownloader/files/34276979)
Supplement: Supplementary file 1 [file 34276979]

**Supplemental Figure 1.**

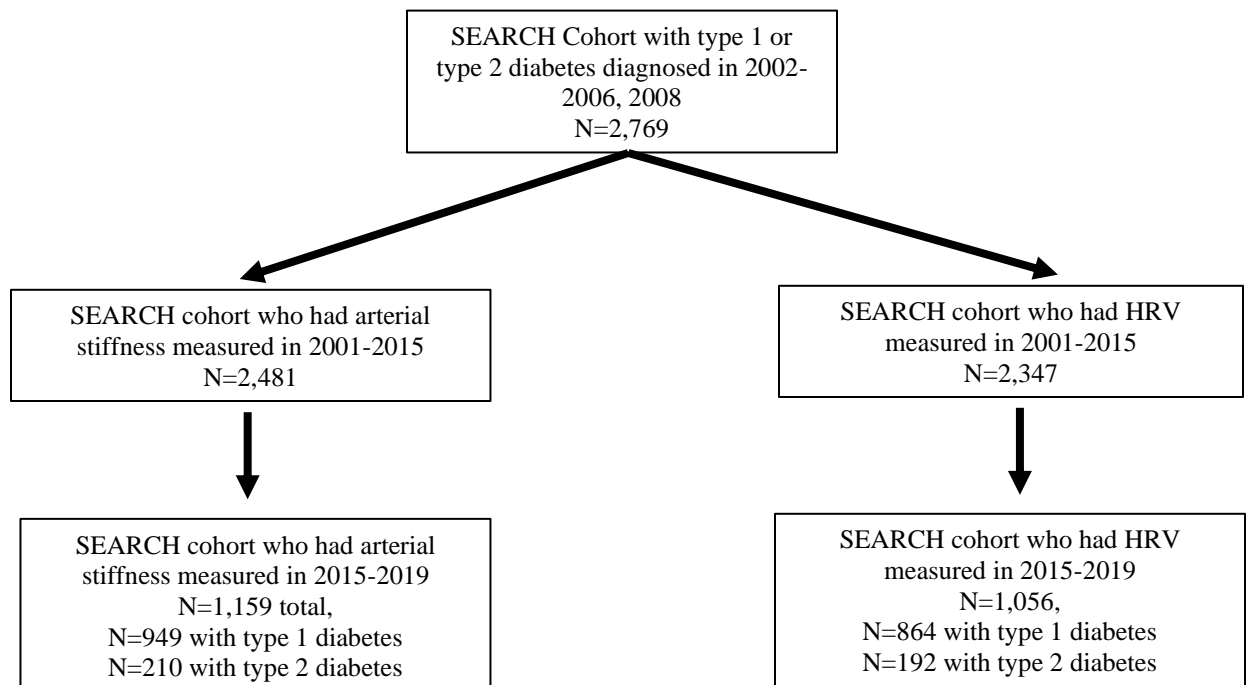

**Supplement Table 1. Characteristics of Participants with HRV data**

|                                         | <b>All<br/>(N=1056)</b> | <b>TYPE 1<br/>(N=864)</b> | <b>TYPE 2<br/>(N=192)</b> | <b>p-value</b> |
|-----------------------------------------|-------------------------|---------------------------|---------------------------|----------------|
| <b>Data at Initial HRV Assessment</b>   |                         |                           |                           |                |
| Age (years)                             | 18.2 (4.9)              | 17.3 (4.7)                | 22.1 (3.4)                | <.0001         |
| Duration of DM (years)                  | 7.9 (1.9)               | 7.9 (1.9)                 | 7.9 (1.9)                 | 0.8654         |
| Race, n (%)                             |                         |                           |                           | <.0001         |
| Non-Hispanic White                      | 553 (52.4%)             | 512 (59.3%)               | 41 (21.4%)                |                |
| Non-Hispanic Black                      | 200 (18.9%)             | 114 (13.2%)               | 86 (44.8%)                |                |
| Hispanic                                | 219 (20.7%)             | 177 (20.5%)               | 42 (21.9%)                |                |
| Other Race Group                        | 84 (8.0%)               | 61 (7.1%)                 | 23 (12.0%)                |                |
| Sex, n (%)                              |                         |                           |                           | <.0001         |
| Female                                  | 58.3%                   | 55.4%                     | 137 (71.4%)               |                |
| Male                                    | 41.7%                   | 44.6%                     | 55 (28.6%)                |                |
| BMI (kg/m <sup>2</sup> )                | 26.0 (7.8)              | 23.8 (5.4)                | 36.1 (8.9)                | <.0001         |
| Waist circumference (cm)                | 88.9 (20.0)             | 83.1 (14.8)               | 115.1 (19.3)              | <.0001         |
| Systolic BP (mmHg)                      | 108.4 (12.7)            | 106.0 (11.3)              | 119.2 (13.0)              | <.0001         |
| Diastolic BP (mmHg)                     | 70.0 (9.8)              | 68.6 (9.1)                | 76.5 (10.3)               | <.0001         |
| Hemoglobin A1c (%)                      | 9.2 (2.2)               | 9.2 (1.9)                 | 9.4 (3.0)                 | 0.5072         |
| LDL Cholesterol (mg/dL)                 | 98.5 (29.8)             | 96.3 (27.6)               | 108.1 (36.8)              | <.0001         |
| HDL Cholesterol (mg/dL)                 | 52.8 (14.5)             | 55.4 (14.1)               | 41.5 (10.4)               | <.0001         |
| Triglycerides (mg/dL)                   | 79.0 (57.0; 117.0)      | 73.0 (54.0; 102.0)        | 121.0 (85.0; 201.0)       | <.0001         |
| <b>Data at Follow-up HRV Assessment</b> |                         |                           |                           |                |
| Age (years)                             | 22.8 (4.9)              | 21.9 (4.8)                | 26.6 (3.4)                | <.0001         |
| Duration of DM (years)                  | 12.5 (2.2)              | 12.5 (2.2)                | 12.4 (2.1)                | 0.2780         |
| BMI (kg/m <sup>2</sup> )                | 27.8 (7.2)              | 26.0 (5.4)                | 35.8 (8.8)                | <.0001         |
| Waist circumference (cm)                | 94.4 (18.1)             | 89.8 (14.2)               | 115.4 (18.6)              | <.0001         |
| Systolic BP (mmHg)                      | 112.1 (13.5)            | 109.9 (11.4)              | 122.3 (16.8)              | <.0001         |
| Diastolic BP (mmHg)                     | 72.7 (10.2)             | 71.1 (9.3)                | 79.8 (11.3)               | <.0001         |
| HbA1c (%)                               | 9.2 (2.3)               | 9.1 (2.0)                 | 9.7 (3.0)                 | 0.0021         |
| LDL Cholesterol (mg/dL)                 | 104.9 (33.1)            | 103.2 (30.9)              | 112.6 (40.9)              | 0.0012         |
| HDL Cholesterol (mg/dL)                 | 52.6 (14.7)             | 54.9 (14.3)               | 42.5 (11.6)               | <.0001         |
| Triglycerides (mg/dL)                   | 84.0 (60.0; 125.0)      | 78.0 (56.0; 108.0)        | 125.0 (94.0; 204.0)       | <.0001         |
| C-reactive Protein (mg/dL)              | 0.2 (0.1; 0.5)          | 0.1 (0.0; 0.4)            | 0.5 (0.2; 1.0)            | <.0001         |

Data are count (percent), mean (SD) or median (25<sup>th</sup> percentile, 75<sup>th</sup> percentile). Other race group includes (2.3% AI/AN, 1.0% Asian, 4.3% multiple races, and 0.4% unknown)
